# Supplementary material for: Evaluation of the digestion and transport profiles and potential immunocompetence of puerarin and its acylated derivatives
Source: Royal Society of Chemistry journal article supplement (doi:10.1039/d1fo00555c), 2021-01-01
Supplement: d1fo00555c1.pdf [file d1fo00555c1.pdf]

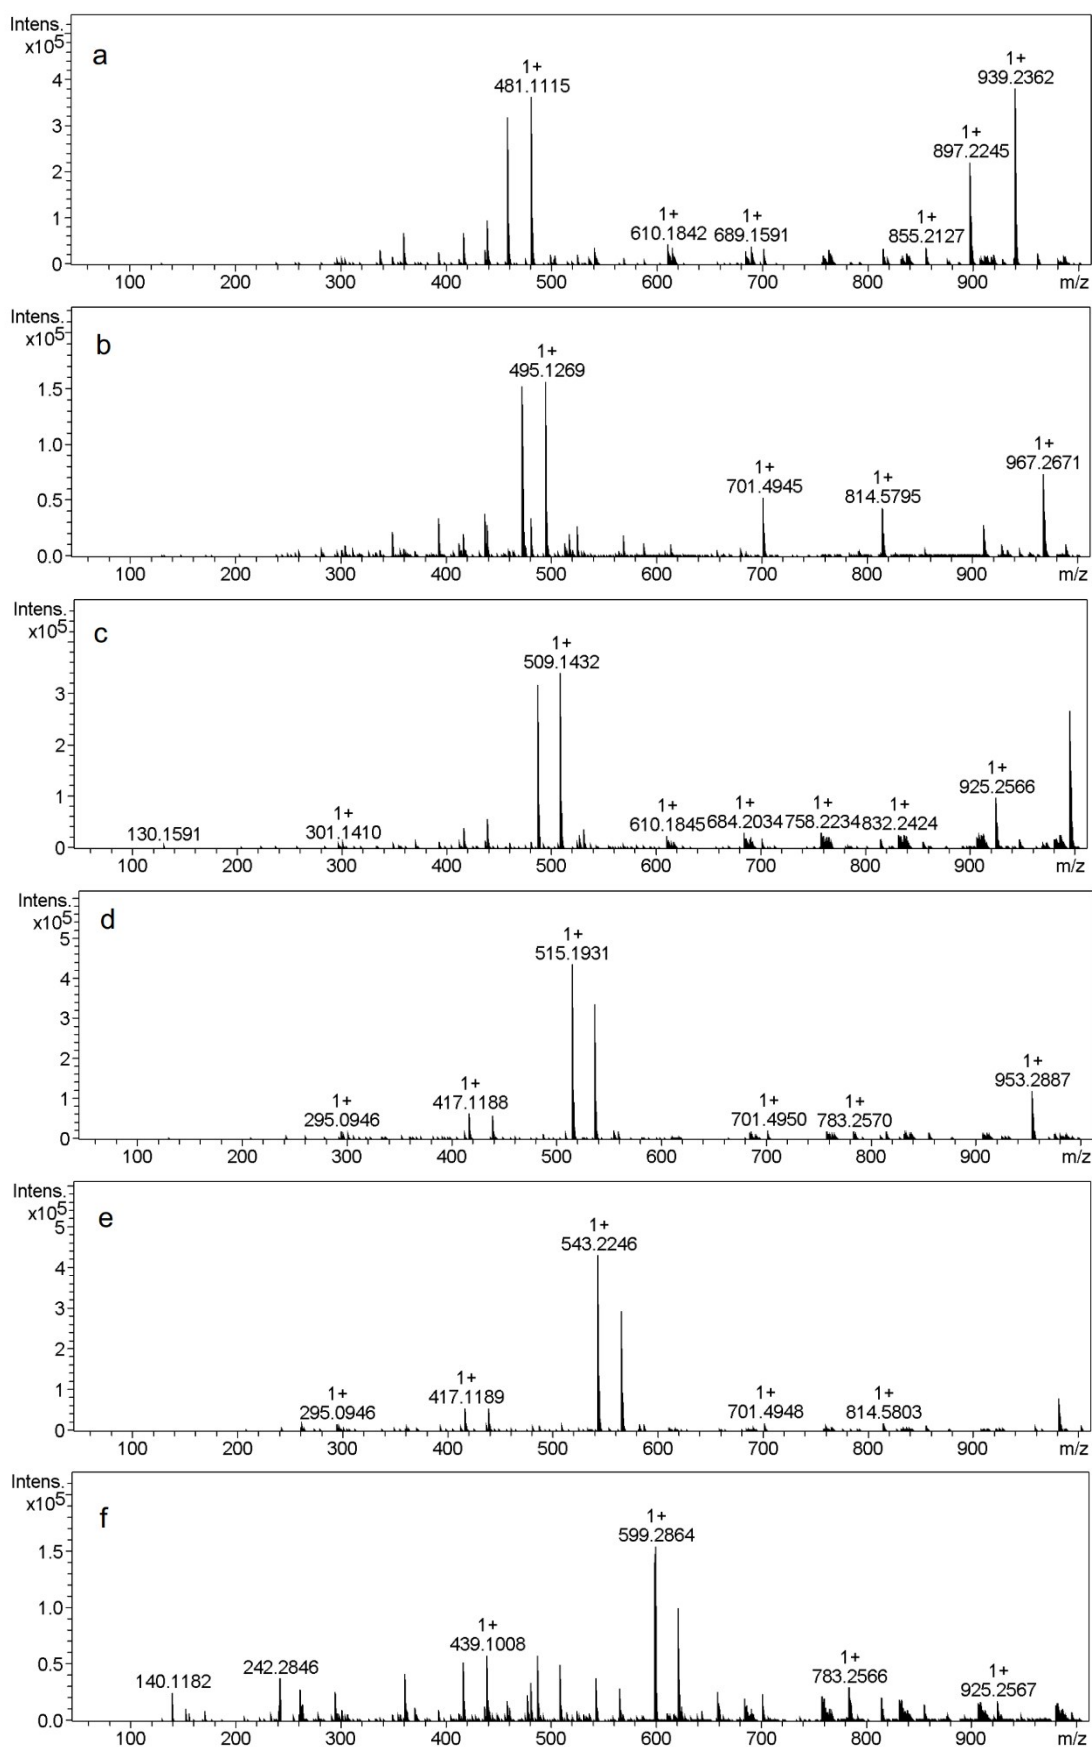

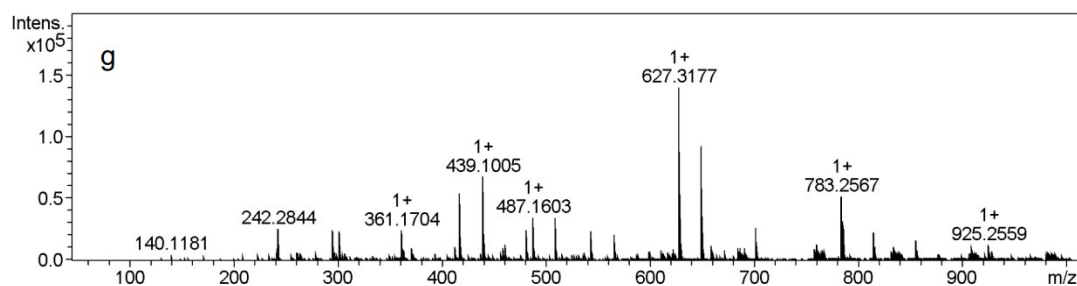

Fig. S1 Preparation of PAES. a-g show high resolution mass spectrum analysis of PAES. a represents **Puerarin acetate**:  $C_{23}H_{22}NaO_{10}$ , 481.11 m/z  $[M+Na]^+$ ; b represents **Puerarin propanoate**:  $C_{24}H_{24}NaO_{10}$ , 495.13 m/z  $[M+Na]^+$ ; c represents **Puerarin butyrate**:  $C_{25}H_{26}NaO_{10}$ , 509.14 m/z  $[M+Na]^+$ ; d represents **Puerarin hexanoate**:  $C_{27}H_{30}O_{10}$ , 515.17 m/z  $[M+H]^+$ ; e represents **Puerarin octanate**:  $C_{29}H_{34}O_{10}$ , 543.20 m/z  $[M+H]^+$ ; f represents **Puerarin laurate**:  $C_{33}H_{42}O_{10}$ , 599.26 m/z  $[M+H]^+$ ; g represents **Puerarin myrisate**:  $C_{35}H_{46}O_{10}$ , 627.29 m/z  $[M+H]^+$

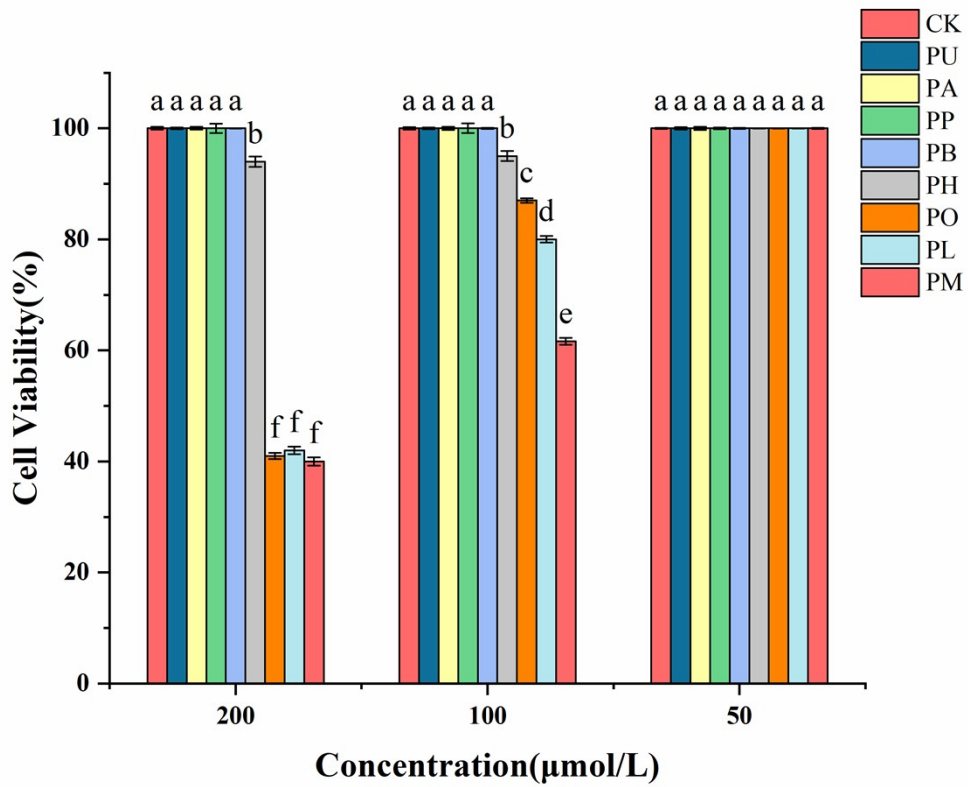

Fig. S2. The cell viability of puerarin and puerarin acid esters

Note: CK: group control, PU: puerarin, PA: puerarin acetate, PP: puerarin propanoate, PB: puerarin butyrate, PH: puerarin hexanoate, PO: puerarin octanate, PL: puerarin laurate, PM: puerarin myrisate. Values of different groups with different lower-case letters (a-f) was significantly different at  $P < 0.05$ .

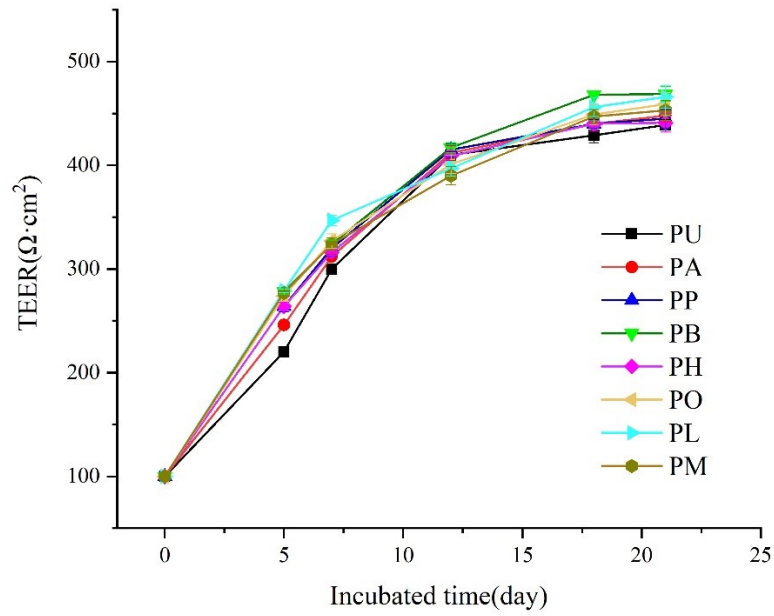

Fig. S3. Relationship between culture time and the TEER value of Caco-2 monolayer

Note: PU: puerarin, PA: puerarin acetate, PP: puerarin propanoate, PB: puerarin butyrate, PH: puerarin hexanoate, PO: puerarin octanate, PL: puerarin laurate, PM: puerarin myrisate.

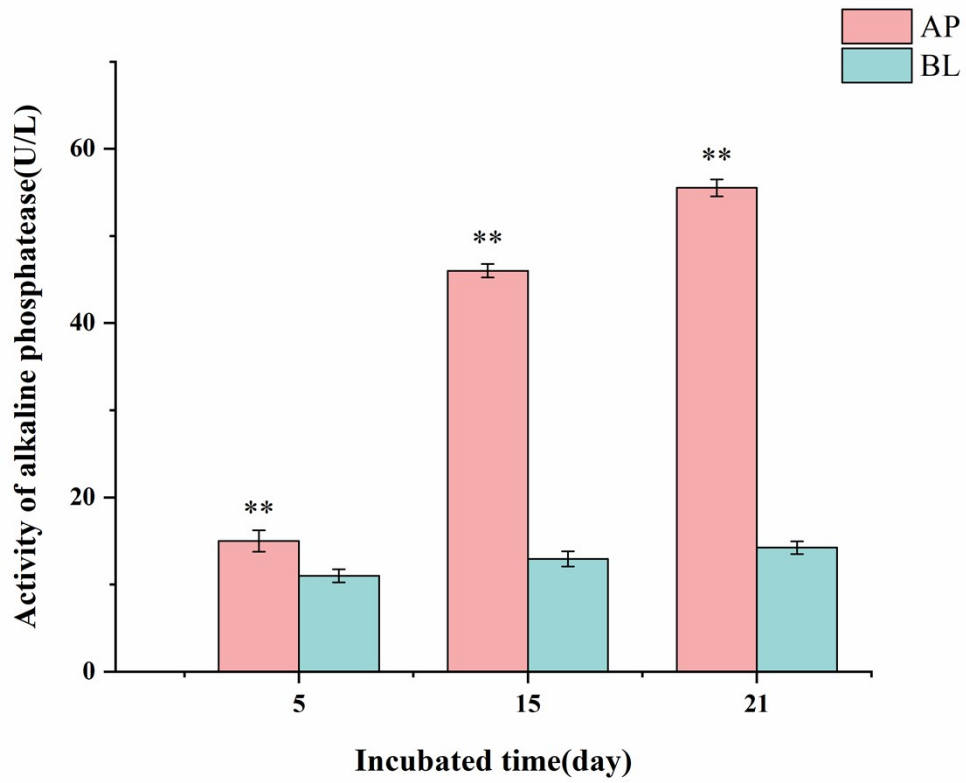

Fig. S4. Relationship between activity of alkaline phosphatase and culture time

Note: Compared with the BL side, \* represents  $P < 0.05$ , \*\* represents  $P < 0.01$ .
